# Supplementary material for: One-step analysis of glucose and acetylcholine in water based on the intrinsic peroxidase-like activity of Ni/Co LDHs microspheres
Source: Royal Society of Chemistry journal article supplement (doi:10.1039/c6tb02273a), 2016-11-12
Supplement: c6tb02273a1.pdf [file c6tb02273a1.pdf]

## Supporting information

### **One-step analysis of glucose and acetylcholine based on intrinsic peroxidase-like activity of Ni/Co LDHs microspheres in water**

Li Su<sup>\*1,2</sup>, Xinai Yu<sup>1,2</sup>, Wenjie Qin<sup>3</sup>, Wenpei Dong<sup>1,2</sup>, Chengke Wu<sup>1,2</sup>, Yan Zhang<sup>1,2</sup>, Guojiang Mao<sup>1,2</sup> and Suling Feng<sup>\*1,2</sup>

1 Collaborative Innovation Center of Henan Province for Green Manufacturing of Fine Chemicals, Key Laboratory of Green Chemical Media and Reactions, Ministry of Education, Henan Normal University, Xinxiang, Henan 453007, P. R. China

2 Henan Key Laboratory of Green Chemical Media and Reactions, School of Chemistry and Chemical Engineering, Henan Normal University, Xinxiang, Henan 453007, P. R. China

3 Qinghai Institute for Products Quality Supervision & Test

\*E-mail: [suli@htu.edu.cn](mailto:suli@htu.edu.cn)

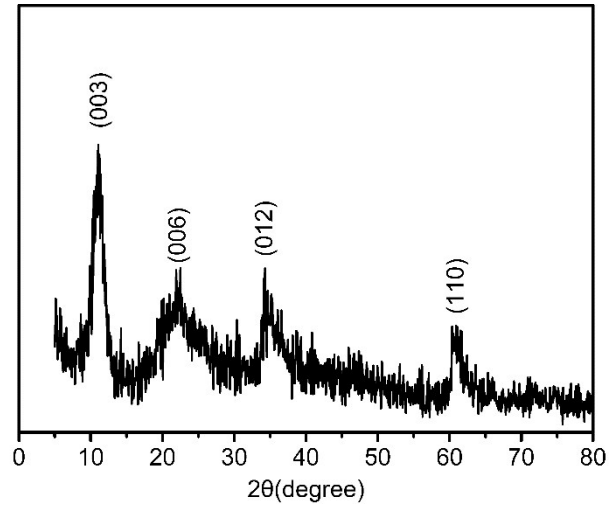

**Figure S1.** XRD pattern of Ni/Co LDHs.

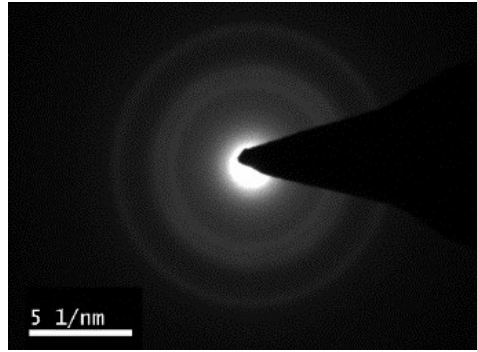

**Figure S2.** SAED pattern of Ni/Co LDHs.

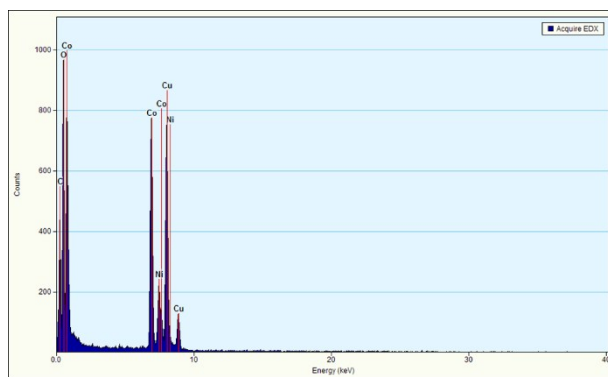

**Figure S3.** EDX spectrum of Ni/Co LDHs.

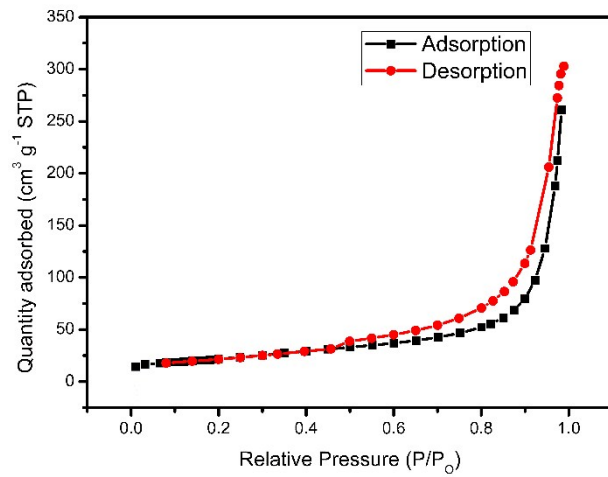

**Figure S4.** Nitrogen adsorption–desorption isotherm of Ni/Co LDHs.

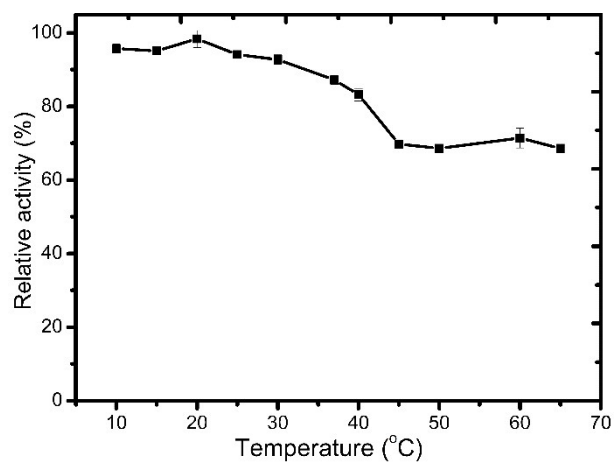

**Figure S5.** The peroxidase-like activity of Ni/Co LDHs is dependent on temperature. The error bars represent the standard deviation of three measurements. The maximum point in each curve was set as 100%.

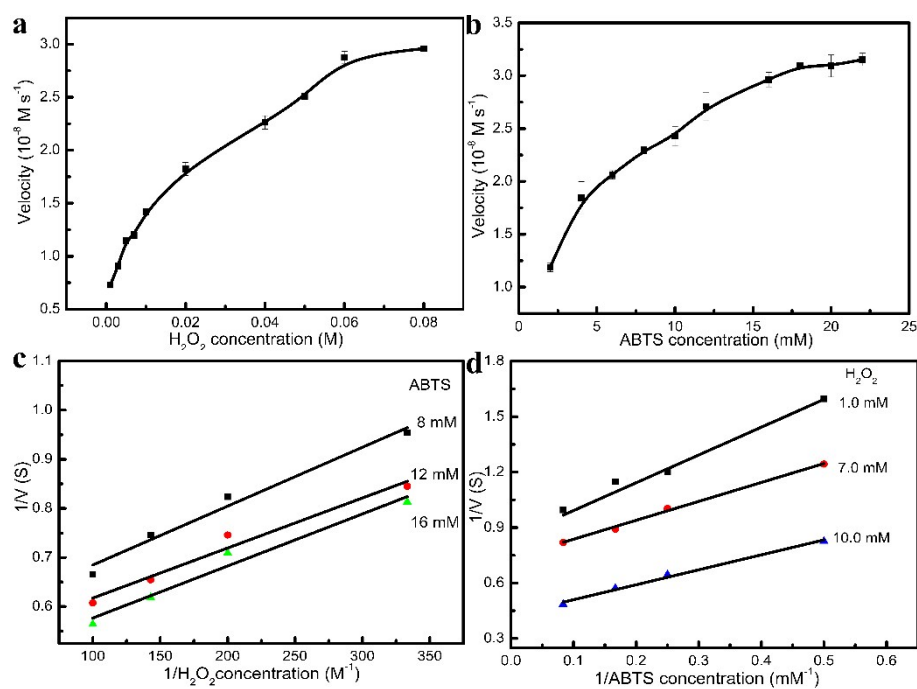

**Figure S6.** Steady-state kinetic assay and catalytic mechanism of Ni/Co LDHs (a–d). The velocity ( $v$ ) of the reaction was measured using 0.1 mL  $1.0 \text{ mg mL}^{-1}$  Ni/Co LDHs in 2.7 mL deionized water at  $37^\circ\text{C}$ . The error bars represent the standard error derived from three repeated measurements. The concentration of ABTS was  $0.53 \text{ mM}$  and  $\text{H}_2\text{O}_2$  concentration was varied (a). The concentration of  $\text{H}_2\text{O}_2$  was  $1.67 \text{ mM}$  and ABTS concentration was varied (b). Double reciprocal plots of activity of Ni/Co LDHs with the concentration of one substrate (ABTS or  $\text{H}_2\text{O}_2$ ) fixed and the other varied (c, d).

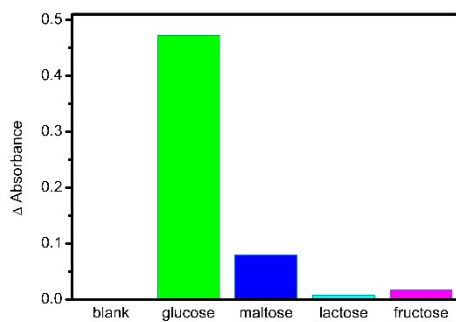

**Figure S7.** Determination of the selectivity of glucose detection (from left to right: blank,  $0.5 \times 10^{-3}$  mol L<sup>-1</sup> glucose,  $3.3 \times 10^{-3}$  mol L<sup>-1</sup> maltose,  $3.3 \times 10^{-3}$  mol L<sup>-1</sup> lactose, and  $3.3 \times 10^{-3}$  mol L<sup>-1</sup> fructose) at 417 nm ( $\Delta A = A_{\text{total}} - A_{\text{blank}}$ ).



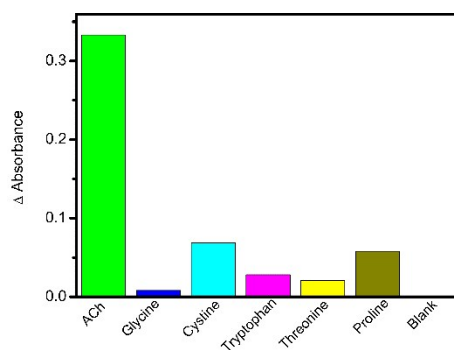

**Figure S8.** Selectivity analysis for ACh detection. (from left to right:  $2.0 \times 10^{-4}$  mol L<sup>-1</sup> ACh,  $8.0 \times 10^{-4}$  mol L<sup>-1</sup> Glycine,  $8.0 \times 10^{-4}$  mol L<sup>-1</sup> Cystine,  $8.0 \times 10^{-4}$  mol L<sup>-1</sup> Tryptophan,  $8.0 \times 10^{-4}$  mol L<sup>-1</sup> Threonine,  $8.0 \times 10^{-4}$  mol L<sup>-1</sup> Proline and Blank) at 417 nm ( $\Delta A = A_{\text{total}} - A_{\text{blank}}$ ).

**Table S1.** Michaelis-Menten parameters of Ni/Co LDHs.

| Catalyst         | Substance                     | $K_m$ /mM | $V_{max}/10^{-8} \text{ M}\cdot\text{s}^{-1}$ |
|------------------|-------------------------------|-----------|-----------------------------------------------|
| HRP <sup>1</sup> | ABTS                          | 1.56      | -                                             |
|                  | H <sub>2</sub> O <sub>2</sub> | 0.24      | -                                             |
| Ni/Co LDHs       | ABTS                          | 3.43      | 3.29                                          |
|                  | H <sub>2</sub> O <sub>2</sub> | 13.2      | 3.24                                          |

| Sample        | Spiked ( $\mu\text{M}$ ) | The proposed method     |              | The GOD-PAP method      |              |
|---------------|--------------------------|-------------------------|--------------|-------------------------|--------------|
|               |                          | Found ( $\mu\text{M}$ ) | Recovery (%) | Found ( $\mu\text{M}$ ) | Recovery (%) |
| Human serum 1 | 5.0                      | 4.8                     | 96.0         | 5.1                     | 102.0        |
|               | 25.0                     | 24.6                    | 98.4         | 24.9                    | 99.6         |
|               | 50.0                     | 51.4                    | 103.0        | 50.8                    | 101.6        |
| Human serum 2 | 5.0                      | 5.3                     | 106.0        | 5.1                     | 102.0        |
|               | 25.0                     | 26.1                    | 104.4        | 25.4                    | 101.6        |
|               | 50.0                     | 48.4                    | 96.8         | 49.1                    | 98.2         |
| Human serum 3 | 5.0                      | 4.7                     | 94.0         | 5.2                     | 104.0        |
|               | 25.0                     | 24.2                    | 96.8         | 24.8                    | 99.2         |
|               | 50.0                     | 52.4                    | 104.8        | 51.3                    | 102.6        |

**Table S2.** Determination of glucose in real samples.

**Table S3.** Determination of ACh in milk sample.

| Milk sample | Added ( $\mu\text{M}$ ) | Found ( $\mu\text{M}$ ) | Recovery (%) |
|-------------|-------------------------|-------------------------|--------------|
| 1           | 25.0                    | 23.8 $\pm$ 0.82         | 95.2         |
| 2           | 75.0                    | 78.6 $\pm$ 0.75         | 104.8        |
| 3           | 125.0                   | 112.8 $\pm$ 0.61        | 90.2         |

## References

1. H. Gallati, *Clinical Chemistry and Laboratory Medicine*, 1979, **17**, 1-8.
